# Supplementary material for: Adaptive learning algorithm based price prediction model for auction lots—deep clustering based interval quoting
Source: PeerJ Comput Sci. 2024 Nov 7;10:e2412. doi: 10.7717/peerj-cs.2412 (PMC11623274; doi:10.7717/peerj-cs.2412)
Supplement: Supplemental Information 2 [file peerj-cs-10-2412-s002.xlsx]

## Sheet: Sheet1
	n=3	precision	recall	F1-score				precision	2	3	4	5	6	7	8
	SVM	0.889	0.879	0.883972				GRU	0.968	0.912	0.909	0.892	0.876	0.853	0.851
	BPNN	0.891	0.883	0.886982				Ours	0.983	0.957	0.937	0.912	0.902	0.891	0.876
	LSTM	0.903	0.911	0.906982
	GRU	0.912	0.907	0.909493			n=3
	Ours	0.957	0.961	0.958996				precision	recall	F1-score
							SVM	0.913	0.903	0.907972
							BPNN	0.925	0.917	0.920983
							LSTM	0.947	0.938	0.942479		LSTM	GRU	Ours		LSTM	GRU	Ours
							GRU	0.958	0.961	0.959498		0.947	0.958	0.971	1	0.947	0.958	0.971
							Ours	0.971	0.973	0.971999		0.929	0.937	0.963	2	0.936	0.937	0.969
	n=5	precision	recall	F1-score								0.915	0.948	0.968	3	0.933	0.948	0.968
	SVM	0.813	0.805	0.80898								0.928	0.941	0.955	4	0.922	0.938	0.958
	BPNN	0.839	0.841	0.839999			n=5	precision	recall	F1-score		0.939	0.938	0.967	5	0.927	0.931	0.963
	LSTM	0.857	0.862	0.859493			SVM	0.905	0.892	0.898453		0.919	0.951	0.959
	GRU	0.892	0.903	0.897466			BPNN	0.919	0.926	0.922487
	Ours	0.912	0.891	0.901378			LSTM	0.929	0.931	0.929999
							GRU	0.937	0.938	0.9375
							Ours	0.953	0.957	0.954996
	n=8	precision	recall	F1-score
	SVM	0.806	0.799	0.802485
	BPNN	0.811	0.802	0.806475
	LSTM	0.837	0.825	0.830957
	GRU	0.851	0.847	0.848995
	Ours	0.876	0.881	0.878493
